# Supplementary material for: Transparent films from carbon nanotubes/Prussian blue nanocomposites: preparation, characterization, and application as electrochemical sensors
Source: Royal Society of Chemistry journal article supplement (doi:10.1039/c1jm14225a), 2011-12-03
Supplement: c1jm14225a.pdf [file c1jm14225a.pdf]

## ***Electronic Supplementary Information***

Transparent films from carbon nanotubes/Prussian  
blue nanocomposites: preparation, characterization  
and application as electrochemical sensor

*Edson Nossol and Aldo José Gorgatti Zarbin\**

Departamento de Química, Universidade Federal do Paraná (UFPR), CP 19081, CEP  
81531-990, Curitiba-PR-Brazil

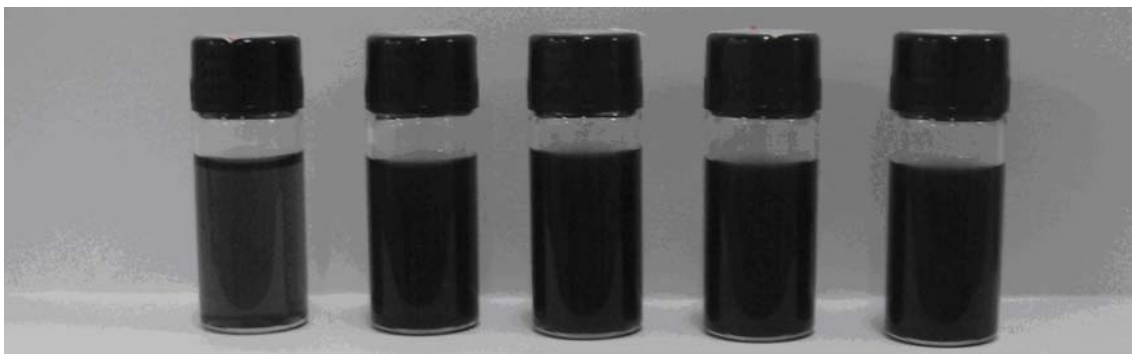

**Fig. S1** Digital photograph of five NMP dispersions of iron- and iron oxide-filled multiwall carbon nanotubes. From left to right: 0.58, 0.87, 1.18, 1.59 and 1.70 mg of CNTs dispersed in 3.00 mL of NMP.

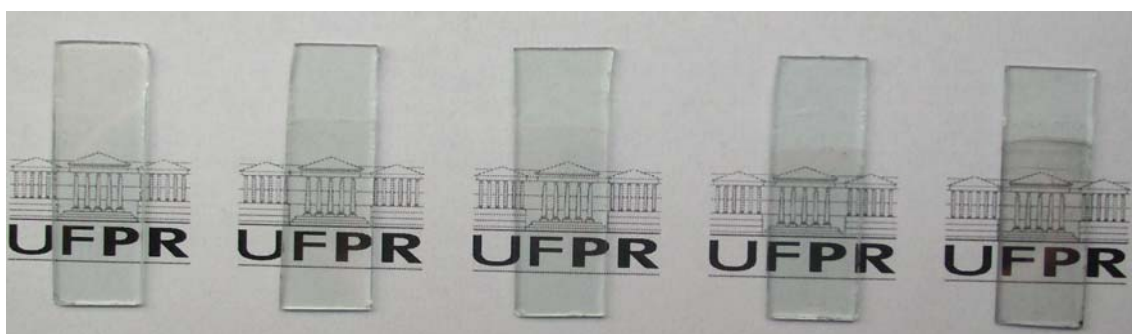

**Fig. S2** Digital photograph of CNTs films prepared over ITO-based glass electrodes. From left to right, films prepared starting from the dispersions showed before (Fig. S1), in the same sequence.

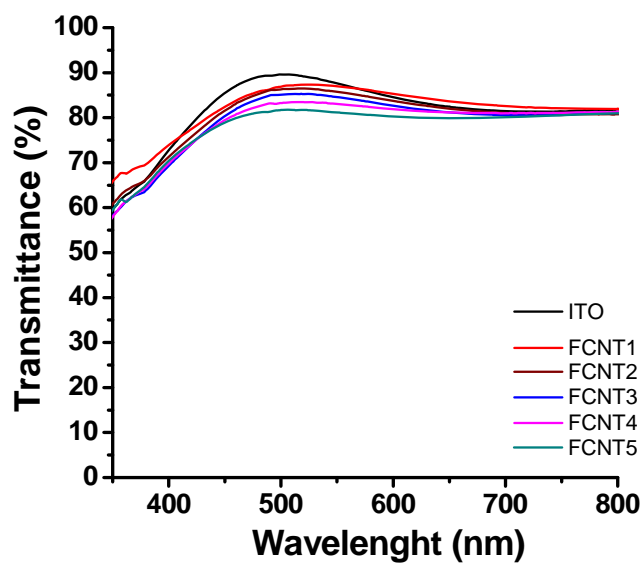

**Fig. S3** Transmittance spectra of a neat ITO-electrode and the five CNTs films showed before (Fig. S2).

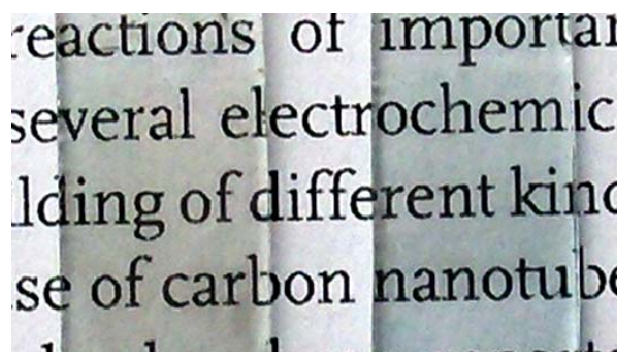

**Fig. S4** Digital photograph of the FCNT5 film before (left) and after (right) the Prussian blue electrodeposition

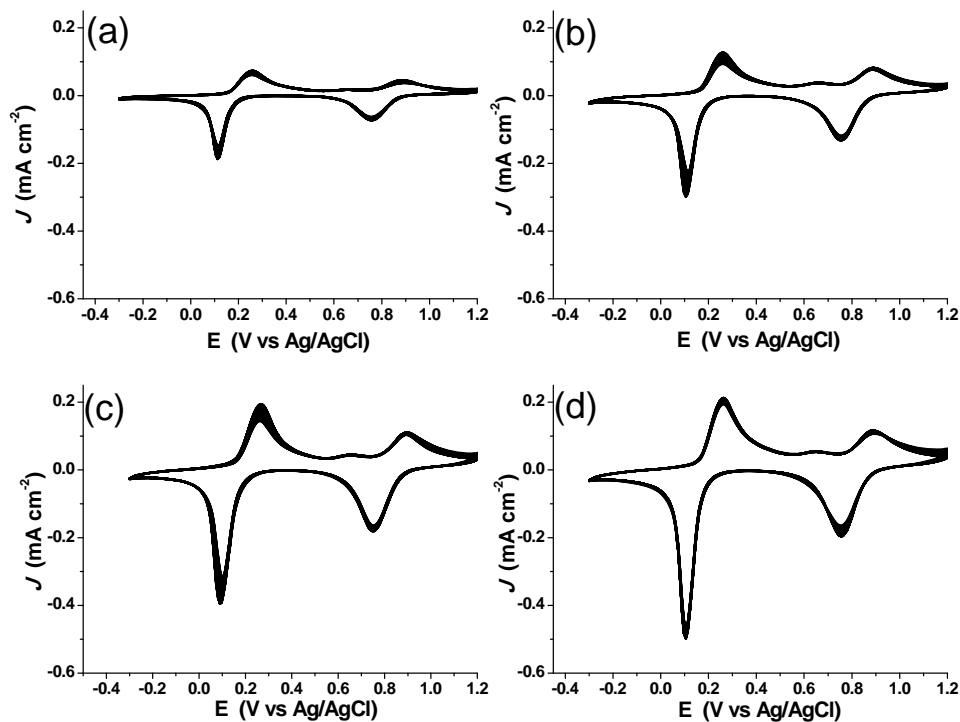

**Fig. S5** Cyclic voltammograms (100 first cycles) in 0.05 mol L<sup>-1</sup> KCl aqueous solution (pH 6.8) at a scan rate of 50 mV s<sup>-1</sup>: (a) FCNTPB1; (b) FCNTPB2; (c) FCNTPB3; (d) FCNTPB4.

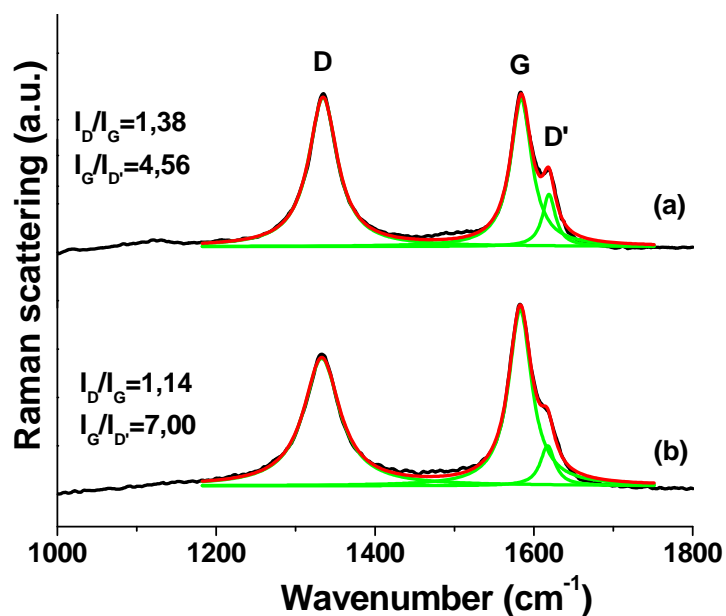

**Fig. S6** Raman spectra ( $\lambda = 632.8$  nm) of the films FCNT5 (a) and FCNTPB5 (b), showing the details of the band deconvolution (green lines) and the fitting (red lines).

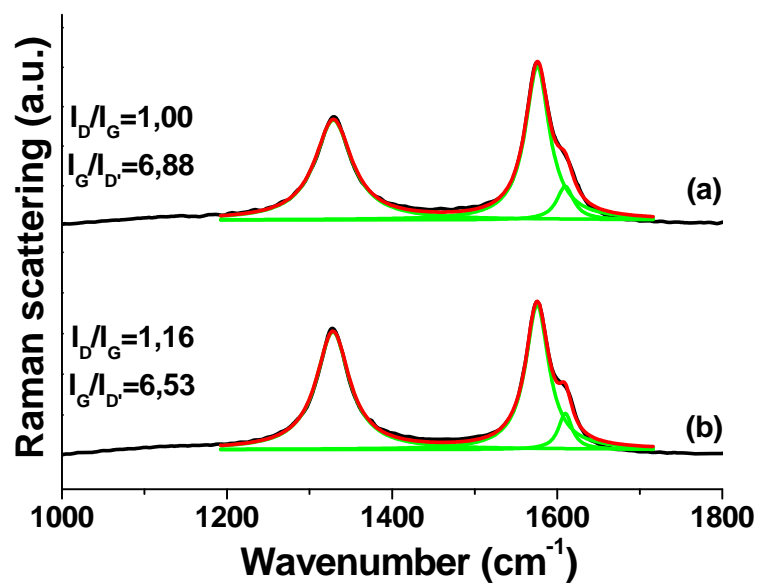

**Fig. S7** Raman spectra of a CNT film (FCNT5) before (a) and after (b) 150 cycles in a 0.05 mol.L<sup>-1</sup> KCl solution.

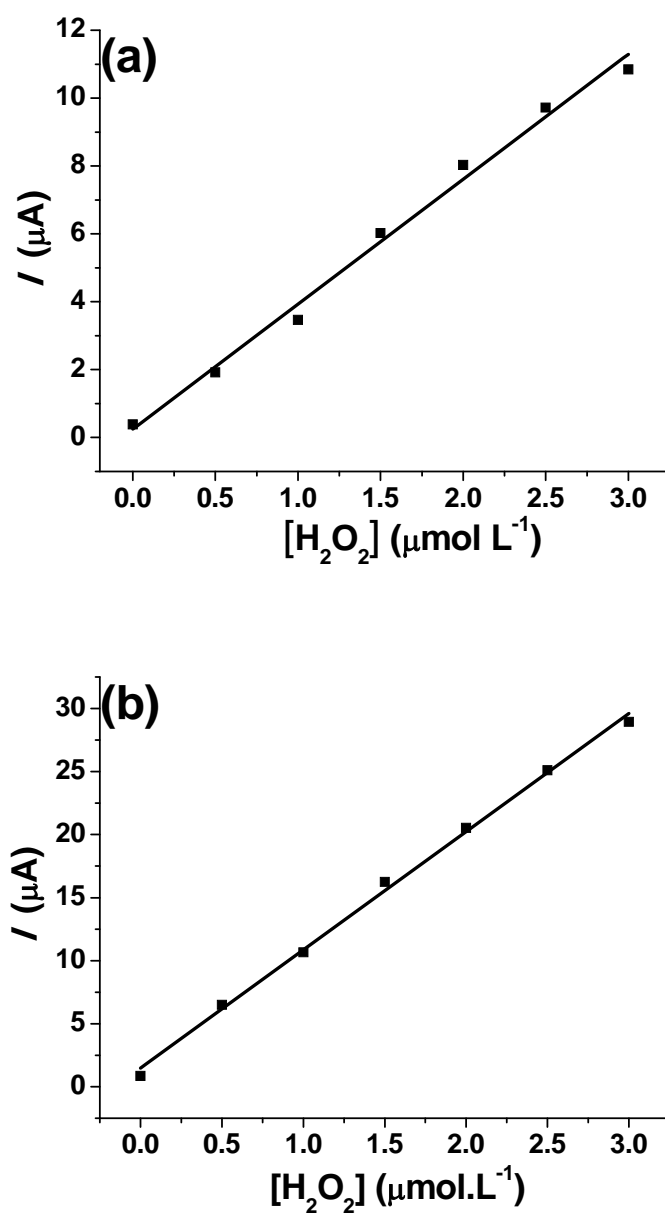

**Fig. S8** Analytical curve obtained from the H<sub>2</sub>O<sub>2</sub> sensors built from the films FCNTPB1 (a) and FCNTPB3 (b).
